# Supplementary material for: High valence Mo-doped Na3V2(PO4)3/C as a high rate and stable cycle-life cathode for sodium battery
Source: Royal Society of Chemistry journal article supplement (doi:10.1039/c7ta08970h), 2017-11-13
Supplement: c7ta08970h1.pdf [file c7ta08970h1.pdf]

## Support

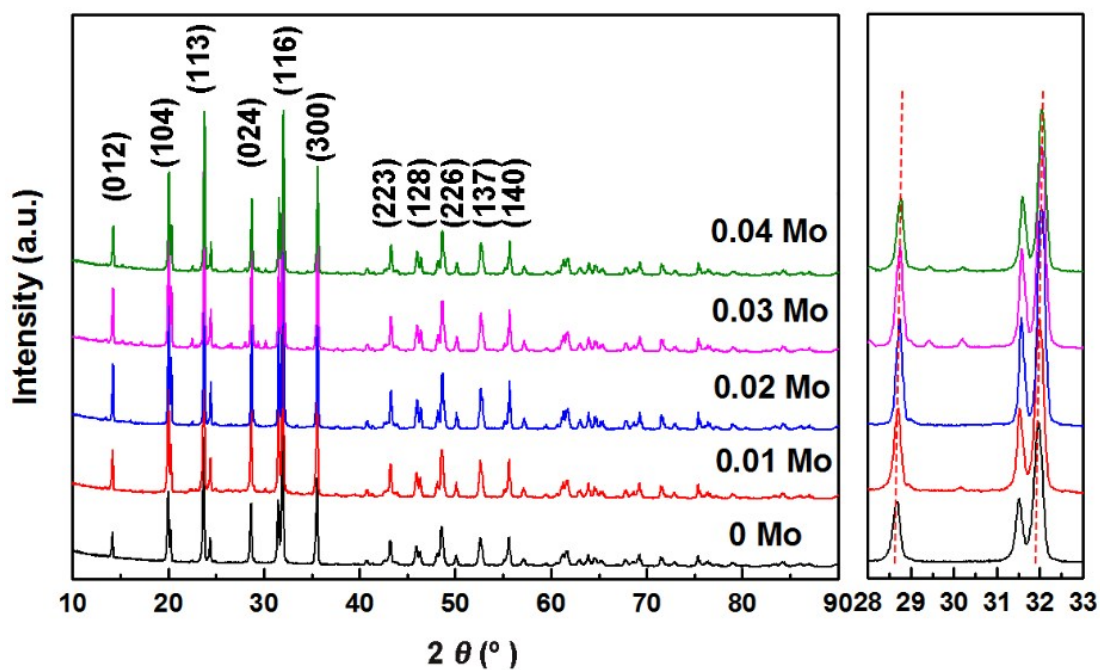

Fig. S1 XRD patterns of  $\text{Na}_{3-5x}\text{Mo}_x\text{V}_{2-x}(\text{PO}_4)_3$  ( $x=0 - 0.04$ ).

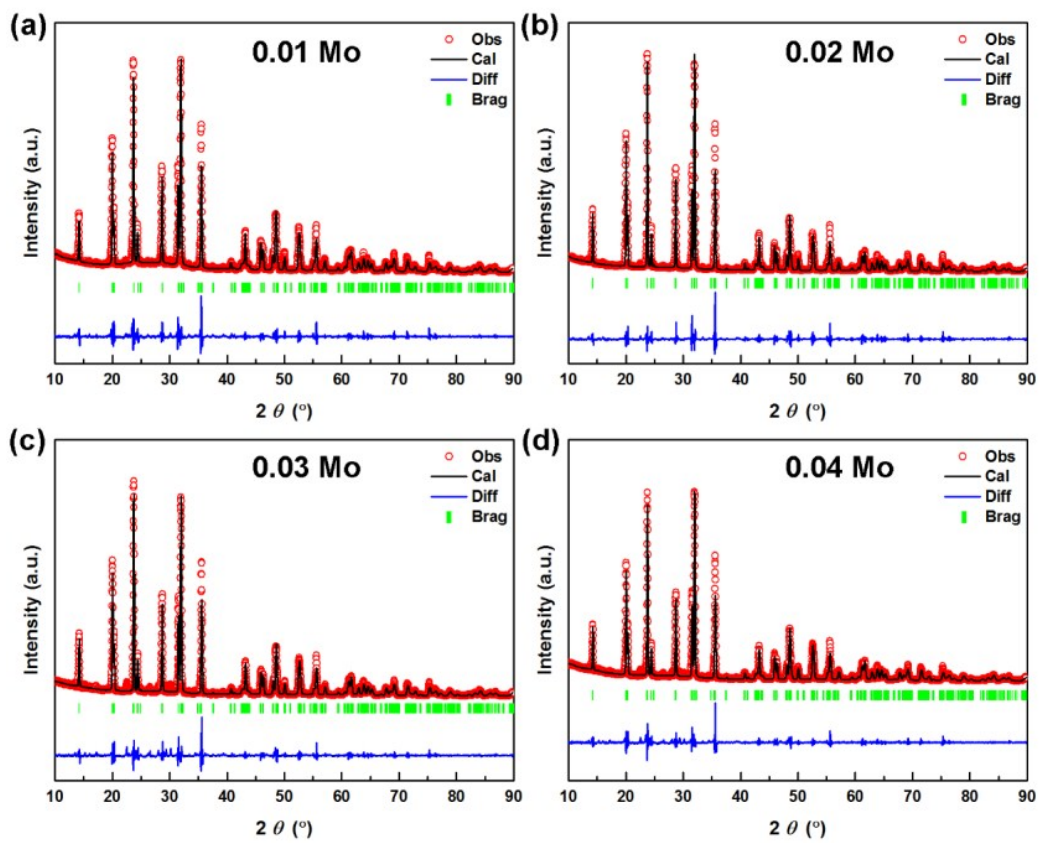

Fig. S2 Rietveld Refinement patterns of  $\text{Na}_{3-5x}\text{Mo}_x\text{V}_{2-x}(\text{PO}_4)_3$

(a)  $x = 0$ ; (b)  $x = 0.01$ ; (c)  $x = 0.03$ ; (d)  $x = 0.04$ .

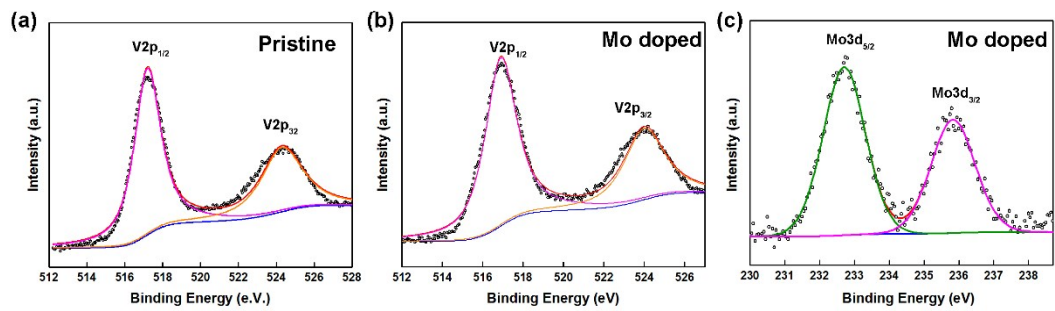

Fig. S3 High resolution X-ray photoelectron spectra of pristine NVP and Mo doped NVP: (a) V 2p, V 2p (a) and Mo 3d (b).

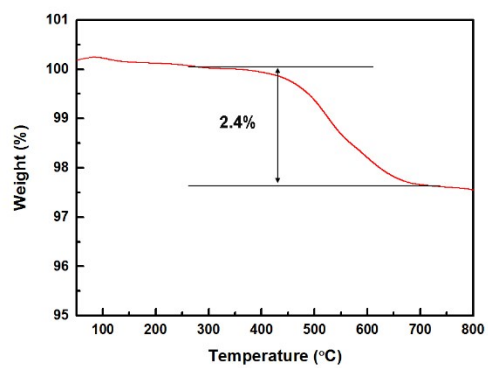

Fig. S4 Thermogravimetry patterns of the NVP/C.

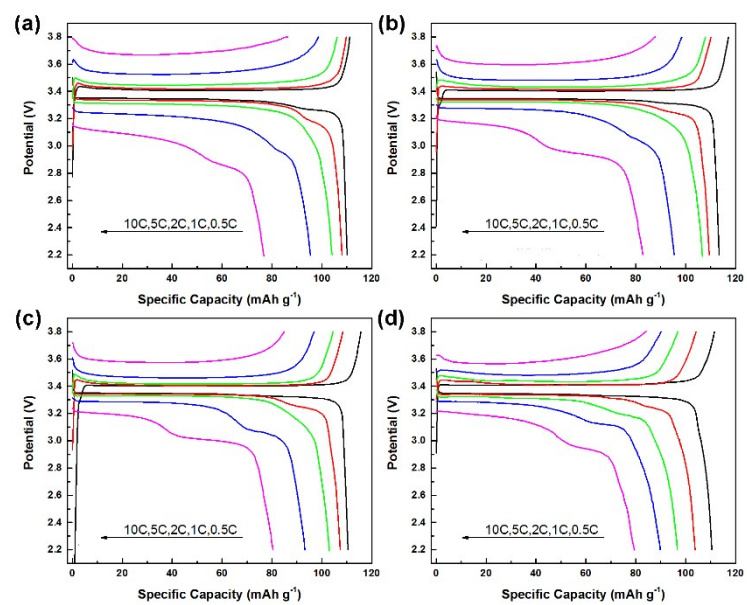

Fig. S5 Charge/Discharge curves of different rate from 0.5C to 10C

(a)  $x = 0$ ; (b)  $x = 0.01$ ; (c)  $x = 0.03$ ; (d)  $x = 0.04$ .

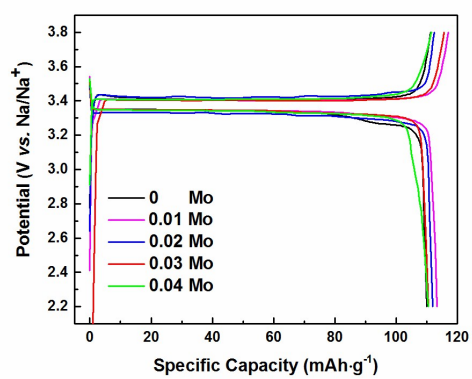

Fig. S6 Comparison charge/discharge curves of  $\text{Na}_{3-5x}\text{Mo}_x\text{V}_{2-x}(\text{PO}_4)_3$  at 0.5C

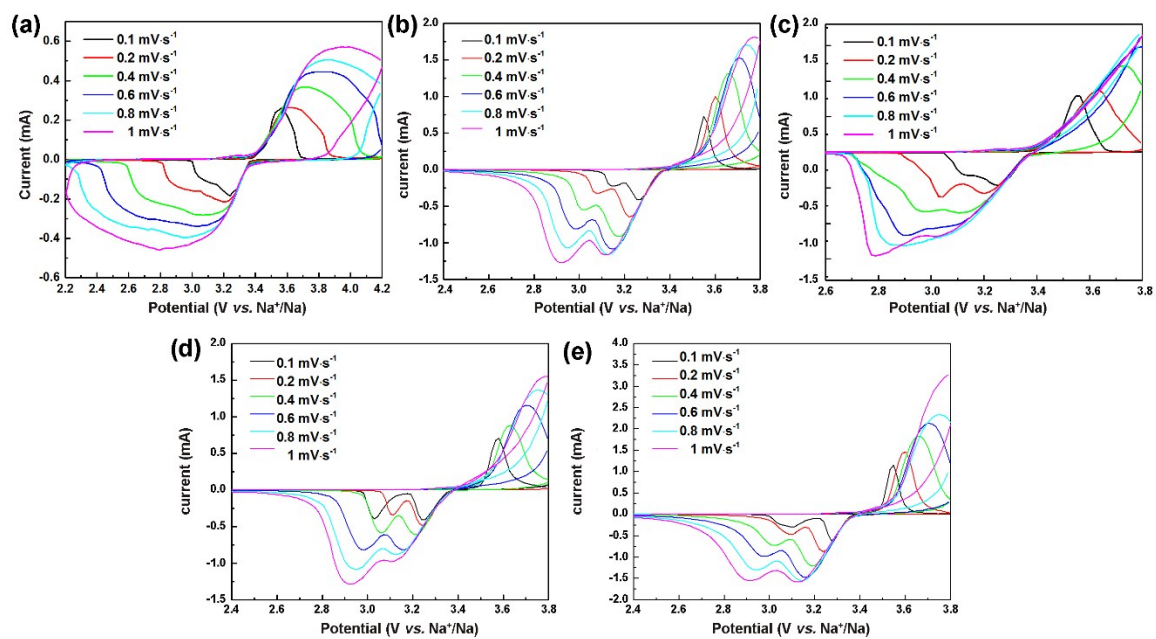

Fig. S7 CV curves of  $\text{Na}_{3-5x}\text{Mo}_x\text{V}_{2-x}(\text{PO}_4)_3$

(a)  $x = 0$ ; (b)  $x = 0.01$ ; (c)  $x = 0.02$ ; (d)  $x = 0.03$ ; (e)  $x = 0.04$ .

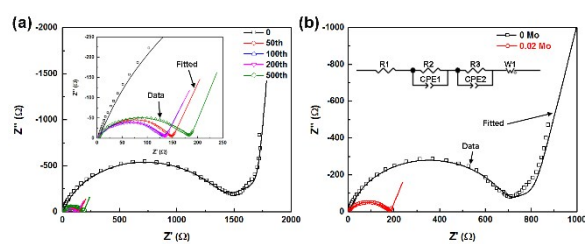

Fig. S8 The Nyquist plots circuit of  $\text{Na}_{2.9}\text{V}_{1.98}\text{Mo}_{0.02}(\text{PO}_4)_3$  at different cycles (a) and comparison of  $\text{Na}_{2.9}\text{V}_{1.98}\text{Mo}_{0.02}(\text{PO}_4)_3$  and  $\text{Na}_3\text{V}_2(\text{PO}_4)_3$  after 500 cycles. (inset: equivalent circuit of  $\text{Na}_{2.9}\text{V}_{1.98}\text{Mo}_{0.02}(\text{PO}_4)_3$ ).



Table S1 parameters of  $\text{Na}_{3-5x}\text{V}_{2-x}\text{Mo}_x(\text{PO}_4)_3$  by Rietveld Refinement

|         | a=b(Å)    | c(Å)       | Volume(Å <sup>3</sup> ) | R <sub>wp</sub> | R <sub>p</sub> |
|---------|-----------|------------|-------------------------|-----------------|----------------|
| NVP     | 8.7142(1) | 21.7908(5) | 1433.04(4)              | 9.27%           | 6.85%          |
| 0.01 Mo | 8.7281(1) | 21.8194(5) | 1439.51(4)              | 10.25%          | 7.45%          |
| 0.02 Mo | 8.7374(1) | 21.8423(4) | 1444.10(3)              | 11.75%          | 8.53%          |
| 0.03 Mo | 8.7403(1) | 21.8588(5) | 1446.13(4)              | 12.22%          | 9.08%          |
| 0.04 Mo | 8.7517(1) | 21.8895(5) | 1451.95(4)              | 10.79%          | 7.81%          |

Table S2 Sodium ion diffusion coefficients (D) of samples (Unit: cm<sup>2</sup> s<sup>-1</sup>)

| Sample                                                                                  | D <sub>Na1</sub>       | D <sub>Na2</sub>       |
|-----------------------------------------------------------------------------------------|------------------------|------------------------|
| Na <sub>3</sub> V <sub>2</sub> (PO <sub>4</sub> ) <sub>3</sub>                          | 7.1955e <sup>-13</sup> |                        |
| Na <sub>2.95</sub> V <sub>1.99</sub> Mo <sub>0.01</sub> (PO <sub>4</sub> ) <sub>3</sub> | 1.1589e <sup>-11</sup> | 5.8044e <sup>-12</sup> |
| Na <sub>2.9</sub> V <sub>1.98</sub> Mo <sub>0.02</sub> (PO <sub>4</sub> ) <sub>3</sub>  | 1.2202e <sup>-11</sup> | 6.0116e <sup>-12</sup> |
| Na <sub>2.85</sub> V <sub>1.97</sub> Mo <sub>0.03</sub> (PO <sub>4</sub> ) <sub>3</sub> | 1.188e <sup>-11</sup>  | 3.3191e <sup>-12</sup> |
| Na <sub>2.8</sub> V <sub>1.96</sub> Mo <sub>0.04</sub> (PO <sub>4</sub> ) <sub>3</sub>  | 1.7082e <sup>-11</sup> | 7.1728e <sup>-12</sup> |

Table S3 EIS fitting results of  $\text{Na}_{3-5x}\text{V}_{2-x}\text{Mo}_x(\text{PO}_4)_3$  in different cycle

|        | 0.02 Mo 0 | 0.02 Mo 50 <sup>st</sup> | 0.02 Mo 100 <sup>th</sup> | 0.02 Mo 200 <sup>th</sup> | 0.02 Mo 500 <sup>th</sup> |
|--------|-----------|--------------------------|---------------------------|---------------------------|---------------------------|
| R1     | 3.137     | 3.358                    | 2.354                     | 2.457                     | 3.356                     |
| R2     | 1344      | 32.7                     | 34.8                      | 24.5                      | 22.5                      |
| R3     | -         | 108.9                    | 92.9                      | 102.9                     | 151                       |
| CPE1-T | 2.456E-6  | 6.036E-6                 | 6.136E-6                  | 6.236E-6                  | 6.536E-6                  |
| CPE1-P | 0.8505    | 0.7507                   | 0.7371                    | 0.7426                    | 0.8678                    |
| CPE2-T | -         | 4.2432E-5                | 4.3576E-5                 | 5.2441E-5                 | 4.3441E-5                 |
| CPE2-P | -         | 0.7229                   | 0.7134                    | 0.7229                    | 0.7183                    |
| W1-r   | 877       | 16.27                    | 20.27                     | 18.43                     | 26.27                     |
| W1-t   | 1.037     | 0.086                    | 0.113                     | 0.123                     | 0.155                     |
| W1-p   | 0.4497    | 0.3866                   | 0.3776                    | 0.3743                    | 0.3998                    |

Table S4 Electronic Conductivities of  $\text{Na}_{3-5x}\text{V}_{2-x}\text{Mo}_x(\text{PO}_4)_3$

|           | Mo 0                              | Mo 0.01                             | Mo 0.02                            | Mo 0.03                           | Mo 0.04                            |
|-----------|-----------------------------------|-------------------------------------|------------------------------------|-----------------------------------|------------------------------------|
| Powders   | $0.2 \text{ S}\cdot\text{m}^{-1}$ | $0.015 \text{ S}\cdot\text{m}^{-1}$ | $2 \text{ S}\cdot\text{m}^{-1}$    | $0.1 \text{ S}\cdot\text{m}^{-1}$ | $0.05 \text{ S}\cdot\text{m}^{-1}$ |
| Electrode | $300 \text{ S}\cdot\text{m}^{-1}$ | $800 \text{ S}\cdot\text{m}^{-1}$   | $1400 \text{ S}\cdot\text{m}^{-1}$ | $750 \text{ S}\cdot\text{m}^{-1}$ | $600 \text{ S}\cdot\text{m}^{-1}$  |
